# Supplementary material for: Droplet delivery and nebulization system using surface acoustic wave for mass spectrometry
Source: Royal Society of Chemistry journal article supplement (doi:10.1039/d0lc00495b), 2020-01-01
Supplement: d0lc00495b3.pdf [file d0lc00495b3.pdf]

Supplementary Material

**Droplet Delivery and Nebulization System Using Surface Acoustic Wave for Mass Spectrometry**

Di Sun,<sup>ab</sup> Karl F. Böhringer,<sup>\*ab</sup> Matthew Sorensen,<sup>c</sup> Erik Nilsson,<sup>c</sup> J. Scott Edgar,<sup>d</sup> and David R. Goodlett<sup>ef</sup>

<sup>a</sup>Department of Electrical and Computer Engineering, University of Washington, Seattle, WA 98195, USA. Email: karlb@uw.edu; Tel: +1-206-221-5177.

<sup>b</sup>Institute for Nano-Engineered Systems, University of Washington, Seattle, WA 98195, USA.

<sup>c</sup>Deurion LLC, Seattle, WA 98103, USA.

<sup>d</sup>Department of Medicinal Chemistry, University of Washington, Seattle, WA 98195, USA.

<sup>e</sup>School of Dentistry, University of Maryland, Baltimore, MD 21201, USA.

<sup>f</sup>International Centre for Cancer Vaccine Science, University of Gdansk, Gdansk, Poland, EU.

## S1 Simulation matrix

The strain-charge form is useful for analyzing actuators and the stress-charge form is useful to analyze vibration and waves. We use the stress-charge form for our simulation. The strain-charge form can be written as:

$$\vec{S} = s_E^T \cdot \vec{T} + \vec{d}^T \cdot \vec{E}$$

$$\vec{D} = \vec{d} \cdot \vec{T} + \vec{\epsilon} \cdot \vec{E}$$

where  $\vec{S}$  is the strain (m/m),  $\vec{T}$  is the stress (N/m<sup>2</sup>),  $\vec{D}$  is the electric displacement (C/m<sup>2</sup>),  $\vec{E}$  is the electrical field (V/m),  $s_E$  is the elastic compliance coefficient (m<sup>2</sup>/N),  $\vec{d}$  is the piezoelectric stress coefficient (C/N) and  $\epsilon$  is the dielectric constant (F/m).

For our substrate material LiNbO<sub>3</sub>, the matrix used can be expressed as:

Elastic stiffness matrix:

$$\vec{c}_{Eij} = \begin{bmatrix} c_{E11} & c_{E12} & c_{E13} & c_{E14} & 0 & 0 \\ c_{E12} & c_{E11} & c_{E13} & -c_{E14} & 0 & 0 \\ c_{E13} & c_{E13} & c_{E33} & 0 & 0 & 0 \\ c_{E14} & -c_{E14} & 0 & c_{E44} & 0 & 0 \\ 0 & 0 & 0 & 0 & c_{E44} & c_{E14} \\ 0 & 0 & 0 & 0 & c_{E14} & c_{E66} = \frac{c_{E11} - c_{E12}}{2} \end{bmatrix}$$

Piezoelectric matrix:

$$\vec{e}_{ij} = \begin{bmatrix} 0 & 0 & 0 & 0 & e_{15} & -e_{22} \\ -e_{22} & e_{22} & 0 & e_{15} & 0 & 0 \\ e_{31} & e_{31} & e_{33} & 0 & 0 & 0 \end{bmatrix}$$

Dielectric matrix:

$$\vec{\epsilon}_{ij} = \begin{bmatrix} \epsilon_{11} & 0 & 0 \\ 0 & \epsilon_{11} & 0 \\ 0 & 0 & \epsilon_{33} \end{bmatrix}$$

The coefficient of LiNbO<sub>3</sub> used for the simulation is from the reference [1], shown in the table below:

Table.1 Elastic Stiffness Coefficient (GPa)

| $C_{11}$ | $C_{12}$ | $C_{13}$ | $C_{14}$ | $C_{33}$ | $C_{44}$ |
|----------|----------|----------|----------|----------|----------|
| 199      | 53.8     | 71.4     | 7.85     | 237.2    | 60.1     |

Table.2 Piezoelectric Coefficient (C/m<sup>2</sup>)

| $e_{15}$ | $e_{22}$ | $e_{31}$ | $e_{33}$ |
|----------|----------|----------|----------|
| 3.65     | 2.39     | 0.31     | 1.72     |

Table.3 Dielectric Constant (pF/m<sup>2</sup>)

| $\epsilon_{11}$ | $\epsilon_{33}$ |
|-----------------|-----------------|
| 398.9           | 232.2           |

## Reference

- [1] K.-K. Wong, *Properties of Lithium Niobate* (no. 28). IET, 2002.

LiNbO<sub>3</sub> wafer, cleaning

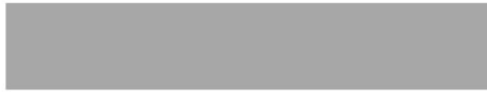

Spin photoresist and pattern

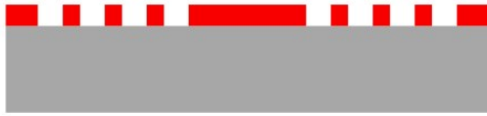

Evaporate Cr/Au

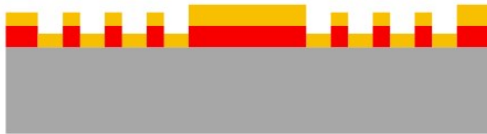

Lift off to get IDE patterns

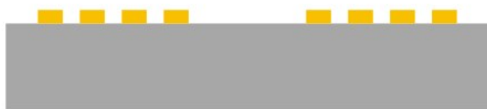

Spin on Cytop and bake

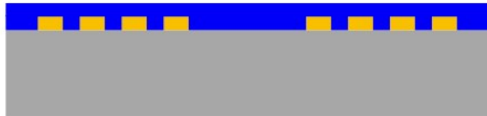

Deposit parylene with CVD

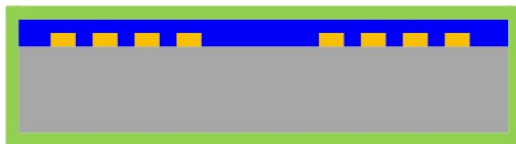

Spin photoresist and pattern

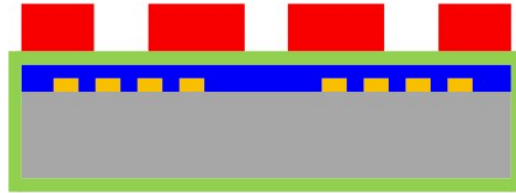

Etch parylene with RIE

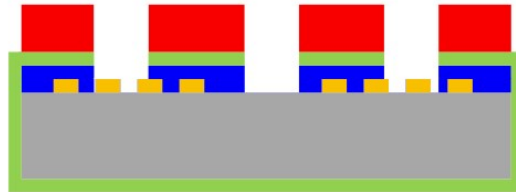

Peel off parylene with tweezers

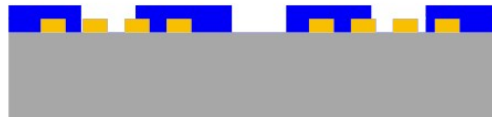

Spin on TMS and bake

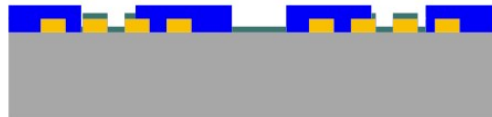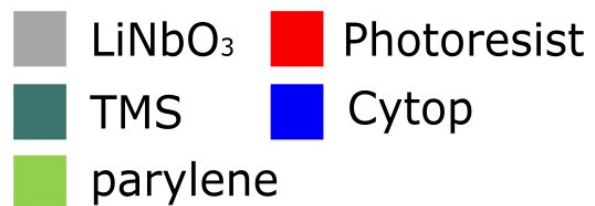

FIG S1. The fabrication process of the SAWN platform with ARC patterns. Parylene is used as the stencil mask without degrading the Cytop hydrophobicity after being peeled off.

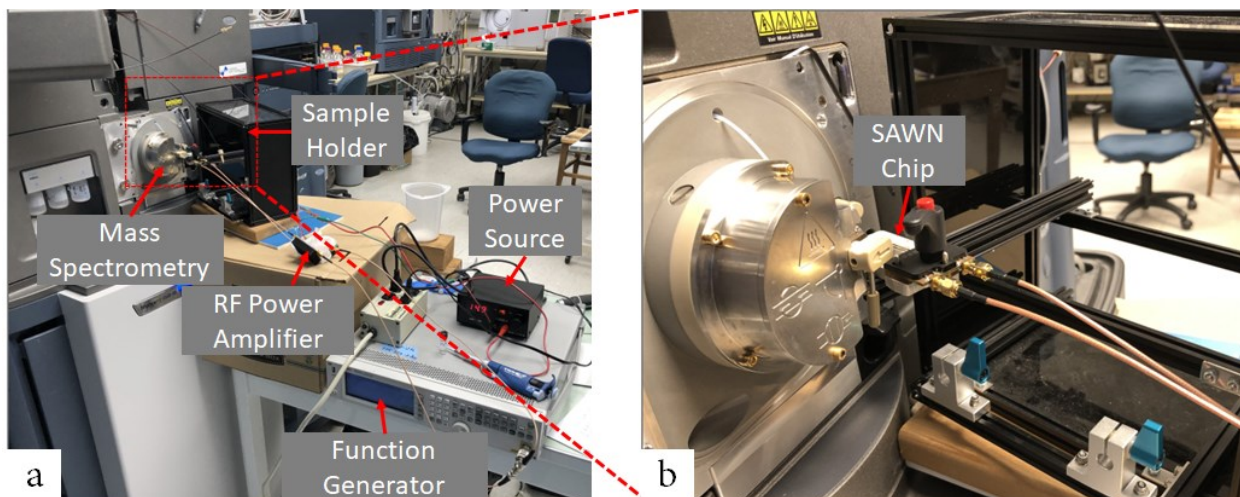

FIG S2. (a) Experimental setup for mass spectrometry measurement. (b) A close look at the sample holder and the SAWN chip mounted close to the mass spectrometer inlet. The mass spectrometry front cover was removed.

**Movie S1. Droplet transport with SW-SAW and ARC**

**Movie S2. Droplet nebulization**
